1 **Effects of cardiac function alterations on the risk of postoperative**  
2 **thrombotic complications in patients receiving endovascular aortic**  
3 **repair**

4 Xiaoning Sun<sup>†,a,b</sup>, Siting Li<sup>†,a,b</sup>, Yuan He<sup>†,c</sup>, Yuxi Liu<sup>†,c</sup>, Tianxiang Ma<sup>c</sup>, Rong Zeng<sup>a</sup>, Zhili Liu<sup>a</sup>,  
5 Yu Chen<sup>c</sup>, Yuehong Zheng<sup>\*,a,b</sup>, Xiao Liu<sup>\*,c</sup>

6 a Department of Vascular Surgery, Peking Union Medical College Hospital, Chinese Academy of  
7 Medical Sciences & Peking Union Medical College, Beijing 100730, China

8 b Department, State Key Laboratory of Complex Severe and Rare Diseases, Peking Union Medical  
9 College Hospital, Chinese Academy of Medical Science and Peking Union Medical College, Beijing,  
10 China

11 c Key Laboratory of Biomechanics and Mechanobiology (Beihang University), Ministry of  
12 Education, Beijing Advanced Innovation Center for Biomedical Engineering, School of Biological  
13 Science and Medical Engineering, Beihang University, Beijing, 100083, China

14 **\*Correspondence:**

15 Yuehong Zheng, [zhengyuehong2022@outlook.com](mailto:zhengyuehong2022@outlook.com)

16 Xiao Liu, [liuxiao@buaa.edu.cn](mailto:liuxiao@buaa.edu.cn)

17

18 **Keywords:** Thrombus, Hemodynamics, Computational model, Ventricular systolic function,  
19 Abdominal aortic aneurysms

20 **Abstract**

21 Chronic heart disease (CHD) is a common comorbidity of patients receiving endovascular aneurysm  
22 repair (EVAR) for abdominal aortic aneurysms (AAA). The ventricular systolic function determines  
23 the hemodynamic environments in aorta, and thus regulating the formation of postoperative  
24 thrombus. However, the explicit relationship between ventricular systolic function and EVAR  
25 complication of thrombotic events is unknown. Here, we proposed a three-dimensional numerical  
26 model coupled with the lumped-elements heart model, which is capable of simulating thrombus  
27 formation in diverse systolic functions. The computational results show that that thrombus tended to  
28 occur at the interior side of the aorta arch and iliac branches, which is consistent with the post-  
29 operative imaging follow-up. In addition, we found that both an increase in maximum ventricular  
30 contractile force and a decrease in minimum ventricular contractile force inhibit thrombus formation,  
31 whereas the effect of heart rate on thrombus formation is not significant. In conclusion, changes in  
32 ventricular systolic function may alter the risk of thrombotic events after EVAR repair, which could  
33 provide insight into the selection of adjuvant therapy strategies for AAA patients with CHD.

34

## 35 **Introduction**

36 Abdominal aortic aneurysm (AAA) is one of the most common degenerative aortic diseases and  
37 is often complicated with various levels of cardiac dysfunction and cardiovascular comorbidities (1).  
38 For advanced and/or rapid-growing aneurysms, prompt surgical or endovascular interventions are  
39 indicated, among which endovascular aortic aneurysm repair (EVAR) is widely accepted as the first-  
40 line treatment option for anatomically feasible cases (2).

41 Intraluminal thrombus formation is commonly observed not only in major arteries with  
42 atherosclerotic and aneurysmal lesions but also, to a lesser degree, intra-prosthetically after  
43 endovascular stenting. Despite its lower rate of occurrence, intra-prosthetic thrombus formation may  
44 lead to post-operative distal embolism, branch occlusion, and critical end-organ malperfusion (3-5).  
45 The formation of intraluminal thrombus and thrombogenic atherosclerotic plaques are believed to be  
46 driven by hemodynamic factors. Pathogenic blood flow that generates oscillatory and non-  
47 physiological wall shear stress may trigger the accumulation of lipid and pro-thrombotic factors (6).  
48 By modeling the process of mass transport in the coagulation cascade, the patient-specific patterns of  
49 formation and distribution of intraluminal/intra-prosthetic thrombus formation can be simulated or  
50 predicted with acceptable accuracy (7, 8). Simulation of thrombus-forming reactions can facilitate the  
51 risk evaluation of post-operative thrombotic events and aid the tailoring of follow-up strategies.

52 However, the outcomes of numerical simulation of fluid dynamics are sensitive to the settings of  
53 boundary conditions (9, 10), which may vary, in real-world scenarios, significantly among patients  
54 with different levels of cardiac output. We noted that only limited and contradicted evidence exists  
55 on whether peri- and postoperative use of cardiac supportive drugs such as  $\beta$ -blockers could be  
56 beneficial for AAA patients after EVAR in light of aneurysmal sac shrinking and clinical outcomes  
57 (11-13). The effects of variations in cardiac function on the risk of intraluminal and intra-prosthetic  
58 thrombus formation are yet to be further elaborated.

59 In this pilot study, by coupling a lumped parameters model of cardiac output and aortic/peripheral  
60 outflow resistance with a 3D numerical mass transport model of thrombus formation, we focused on  
61 investigating the relation of cardiac functions and the predicted risk of thrombus formation in the  
62 aorta and/or endograft of 4 patients who underwent EVAR. Relative risks for thrombus formation  
63 were identified using machine-learning algorithms.

## 64 **Methods**

## 65 **Imaging acquiring and 3D model reconstruction**

66 Four patients diagnosed with AAA who received EVAR and regular follow-ups at the  
67 department of vascular surgery of Peking Union Medical College Hospital were included. DICOM  
68 format of CTA images of each patient from preoperative and at least 6 months post-operative was  
69 obtained. Mimics 12.0 (Materialise, Belgium) and CRIMSON (14) were used to reconstruct 3D  
70 models of the aorta from ascending aorta to aortoiliac bifurcations, with preservation of major  
71 branches in the arches and the thoracoabdominal segments (Figure 1a). Models were subsequently  
72 smoothed with WRAP (v2017, Geomagic) and loaded into SOLIDWORKS (v18, Solidworks Co.).  
73 Vessel outlets were trimmed and extended sufficiently to allow for the fully developed flow pattern.  
74 The geometric model was meshed with a tetrahedral mesh using ICEM (v17.0, ANSYS, Inc.). The  
75 global meshing size was chosen at 0.02 mm to accommodate the smallest components. Elements of  
76 the boundary layers were set to be hexahedral with a primary thickness of 0.001 mm and would  
77 gradually develop over 5 layers (Figure 1b). Under steady-state conditions, grid independence is  
78 considered to be achieved when the mean difference between WSS and platelet concentrations in two  
79 continuous simulations is less than 1%. The study followed the Helsinki Declaration and was  
80 approved by the ethical committee of Peking Union Medical College Hospital. Written informed  
81 consent was obtained from all participants.

## 82 **Mathematical modeling for 0D model**

83 The aorta was separated into three sections and represented by three RLC elements. The outlets  
84 of the aorta are modeled as the three elements Windkessel model(15). The parameters in the RLC  
85 element and Windkessel model were calculated by solving the differential equations based on the  
86 blood flow pressure and velocity. In addition, a function imitating ventricular systole is used in the  
87 lumped parameter model of the heart module. Through animal tests, Suga and Sagawa(16) developed  
88 a ventricular pressure-volume relationship that can be expressed as a time-varying function  $E(t)$ , as  
89 indicated in Equation (1):

$$90 \quad E(t) = \frac{P_{sv}(t)}{V_{sv}(t) - V_0} \quad (1)$$

91 where  $E(t)$  is the time-varying function (mmHg/ml),  $P_{sv}(t)$  is the time function of ventricular pressure  
92 (mmHg),  $V_{sv}(t)$  is a time function of ventricular volume (ml), and  $V_0$  is the ventricular reference  
93 volume (ml), which is the theoretical volume relative to ventricular zero pressure. Boston(17)

94 proposed a mathematical fit to determine the function of ventricular systole according to equation  
95 (2):

$$96 \quad E(t) = (E_{max} - E_{min}) \cdot E_n(t_n) + E_{min} \quad (2)$$

97 where  $E_{max}$  refers to the ventricular pressure-volume relation at end-systole,  $E_{min}$  refers to the  
98 ventricular pressure-volume relation at end-diastolic.  $E_n(t_n)$  represents the normalized function of  
99 ventricular elasticity, which is described as the Hill equation as follows(18):

$$100 \quad E_n(t_n) = 1.55 \left[ \frac{(t_n/0.7)^{1.9}}{1 + (t_n/0.7)^{1.9}} \right] \left[ \frac{1}{1 + (t_n/1.17)^{1.9}} \right] \quad (3)$$

101 where  $t_n$  is  $t/T_{max}$ , and the  $T_{max}$  can be calculated from the cardiac cycle:

$$102 \quad T_{max} = 0.2 + 0.15T \quad (4)$$

### 103 **Mathematical modeling for 3D simulation of thrombus formation**

104 In this article, we simulate the 3D formation of thrombus by solving the convection-diffusion-  
105 reaction equations. The thrombus formation is tracked through the formation of bounded platelets  
106 (BPs), which was induced by localized high concentration of activated platelets (APs), coagulation  
107 enzymes (C), and prolonged flow residence time (RRT). The schematic of the thrombus formation is  
108 illustrated in Figure 1 g. We only show the general form of the equation here, and the complete  
109 reactions and parameters adapted from the published models (8, 19, 20) are explained in detail in  
110 Table S2 and Table S3:

$$\frac{\partial [C_i]}{t} + \nabla \cdot (\mathbf{u} \cdot [C_i]) = \nabla \cdot (D_i \cdot \nabla [C_i]) + S_i \# (5)$$

111 where  $[C_i]$  is the concentration of species  $i$ ;  $\mathbf{u}$  represents the blood flow velocity vector;  $D_i$  refers to  
112 the diffusivity of species  $i$  in blood; and  $S_i$  is a local reaction source term for species  $i$ . The species  
113 considered in this model include rested platelets [RPs], activated platelets [APs], coagulation  
114 enzymes[C], and flow residence time [RT].

115 The bounded platelets (BPs) attached to the reactive surface have neither convective nor  
116 diffusive motion; therefore, in this case, Equation (6) is simplified and the deposition of platelets are  
117 governed by the following concentration rate equations:

$$\frac{\partial[C_{BP}]}{t} = S_{BP} \#(6)$$

118 where  $S_{BP}$  is the local generation rate of bounded platelets (BPs).

119 Considering the resistance of bounded platelets to blood flow, the momentum source term was  
120 added to the Navier-Stokes equations, and the viscosity coefficient was modified. Equation (7) shows  
121 the modified Navier-Stokes equations. and Eq (8) and (9) show the modified viscosity and source  
122 term:

$$\rho \frac{\partial \mathbf{u}}{\partial t} + (\mathbf{u} \cdot \nabla) \mathbf{u} = -\nabla p + \mu \Delta \mathbf{u} - S_M \#(7)$$

$$S_M = k_m \frac{[BP]^2}{[BP]^2 + [BP]_t^2} \mathbf{u} \#(8)$$

$$\mu = k_\mu \left( 1 + \frac{[BP]^2}{[BP]^2 + [BP]_t^2} \right) \#(9)$$

123 where  $\rho$  represents the blood density equals  $1050 \text{ kg/m}^3$ ,  $\mathbf{u}$  represents the blood flow velocity vector,  
124  $p$  represents blood pressure,  $\mu$  represents the blood viscosity, and  $S_M$  represents the local source  
125 term of flow momentum. Detailed value of coefficient  $k_m$ ,  $k_\mu$  can be found in supplement material  
126 (Supplementary Table S3).

## 127 **Multiscale simulation methods and procedures**

128 Our model coupled the 3D simulation with the lumped-elements model. First, based on the  
129 clinically measured blood flow pressure and velocity(8), we transformed the aortic model from 3D to  
130 lumped elements and coupled the boundary nodes to Windkessel elements (Figure 1c, d, detailed  
131 parameters in Supplementary Table S1). Subsequently, the lumped-elements model representing the  
132 heart was coupled to the entrance node in the lumped-elements aortic model (Figure 1e). We first  
133 adjusted the heart model's parameters so that the averaged cardiac output and aortic inlet blood  
134 pressure levels matched the clinically determined values. To mimic the various heart functions, we  
135 swept the parameters  $E_{\max}$  (end-systolic elastance),  $E_{\min}$  (end-diastolic elastance), and T (heart rate)  
136 from 10% to -10% compared to the reference values and got the corresponding aortic blood flow  
137 velocity in different heart functions. Finally, we simulated the formation of thrombus in the 3D aorta  
138 under various cardiac functions, the boundary conditions of which are derived from the blood flow

139 velocity at the boundary nodes in the lumped-elements model (Figure 1f, g). The 3D simulations of  
140 blood flow and thrombus formation were performed in FLUENT (v17.0, ANSYS, Inc.) with user-  
141 defined functions, whereas the lumped-elements simulations were performed in MATLAB (R2021b,  
142 MathWorks, Inc.) The results were analyzed and visualized using CFD-Post (v17.0, ANSYS, Inc.).

### 143 **Statistical Analysis**

144 Data were analyzed using Prism software (v9.0, GraphPad Prism, Inc). Statistical significance  
145 for samples was determined using two-tailed unpaired Student's t-test. Data were considered  
146 statistically significant if  $P < 0.05$ . The Parallel coordinate analysis and the Multiple correspondence  
147 analysis are performed in MATLAB (R2021b, MathWorks, Inc.).

### 148 **Results**

#### 149 **Demographic characteristics and clinical verification of thrombus formation region**

150 The baseline information of 4 patients were shown in table 1. There were 3 male and 1 female  
151 patients, with an average age of  $74.3 \pm 7.6$  years. Pre-operatively, laboratory results indicated normal  
152 cardiac and renal function for the 4 subjects. All 4 patients underwent the operation successfully, and  
153 follow-up CTA suggested patency of stents and visceral branches. Concerning thrombus formation,  
154 CTA results in Figure 2 (A1-D1) illustratrd that thrombus was found at the root of the left subclavian  
155 artery for patient number 3. For patient number 1, 2, and 4, CTA images all showed thrombus within  
156 the iliac stents. Thrombus was not observed at other parts of the arterial or stent model from clinical  
157 images. These regions with thrombus formation were defined as the region of interests (ROI) in the  
158 following analysis.

159 The hemodynamic parameters and BP levels at ROI were demonstrated in Figure 2 and Figure 3.  
160 The TAWSS, oscillatory shear index (OSI), and relative residence time (RRT) profiles of 4 models  
161 were illustrated in Figure 3. In general, TAWSS was highest at the visceral branch level in all 4  
162 patients, which indicated higher frictional force exerted on these vessel areas by the blood flow and  
163 prevented activated platelets from binding to coagulant to form thrombus in our model. Descending  
164 aorta and iliac branches had higher RRT, which indicated a higher degree of retention for a substance  
165 in the bloodstream at the region and induced the development of thrombus in our model (See  
166 supplementary material). RRT also increased at the oversizing area for the iliac branches. However,  
167 zooming in on the ROI in Figure 2 did not indicate distinct abnormal local CFD parameters. In

168 addition, no significant difference in TAWSS, OSI, and RRT was observed for the ROI compared to  
169 the average levels of the whole model (right channel in Figure 3). On the other hand, patterns of BP  
170 distribution from the thrombus model simulation (Figure A2-D2) corresponded well with the  
171 thrombus results from ROI.

## 172 **Impact of cardiac function alterations on thrombosis**

173 The impact of heart function alteration on thrombus formation in the ROI as well as the aortic  
174 inlet velocity were shown in Figure 4. For patient 1, 2, and 4, the iliac branches were shown, while  
175 the arch and descending aorta was illustrated for patient 3.

176 The aortic velocity profile demonstrated that the magnitude and shape of the blood flow profile  
177 are affected by the heart function parameters of  $E_{\max}$ ,  $E_{\min}$ , and  $T$ . Then we analyzed the formation of  
178 thrombus, which was induced by the altered heart functions. First of all, the increased  $E_{\max}$  (end-  
179 systolic elastance, representing maximum ventricular contractile force) could maintain or alleviate  
180 thrombus formation levels in the ROI of four patients. However, the effects of decreased  $E_{\max}$  are  
181 heterogeneous. For patient 1, a decrease in  $E_{\max}$  would result in an increase in thrombus  
182 development at the iliac branches. However, for patients 2-4, the lower  $E_{\max}$  would result in less  
183 thrombus development at the arch and descending aorta. In addition, the increased  $E_{\min}$ , which  
184 represents ventricular compliance, would maintain or exacerbate the thrombus formation in the ROI  
185 of four patients. The decreased  $E_{\min}$  would maintain or alleviate the thrombus formation in these  
186 regions. Furthermore, the influences of heart rate ( $T$ ) on thrombus formation are less significant.

187 We evaluated the area-averaged BP concentration and area-averaged TAWSS (traditional  
188 indicator) of the four patients to quantitatively highlight the associations between heart function and  
189 thrombus formation in ROI. We discovered that TAWSS is largely affected by  $E_{\max}$  level, while  $E_{\min}$   
190 and  $T$  have little impact by showing the Parallel coordinate charts classified by the heart function  
191 ( $E_{\max}$ ,  $E_{\min}$ ,  $T$  ranges from +10% to -10% compared with the reference condition). In addition, we  
192 found that increasing  $E_{\max}$  and decreasing  $E_{\min}$  could reduce overall thrombus formation levels  
193 (Figure 5a-5b), which is in agreement with the qualitative analysis. Besides, both the increase and  
194 decrease of heart rate ( $T$ ) would exacerbate the thrombus formation level (Figure 5c). The effects of  
195  $E_{\min}$  and  $t$  on TAWSS, however, were not significant, indicating the limitations of using  
196 hemodynamic features to predict thrombus development. Then, we performed the multidimensional  
197 analysis method to quantitatively reveal the correlations among  $E_{\max}$ ,  $E_{\min}$ ,  $T$ , and thrombus



198 formation. We found that the BP concentration was negatively correlated with  $E_{\max}$ , and was  
199 positively related with  $E_{\min}$  (Figure 5c). However, there was a lack of correlation between heart rate  
200 (T) and BP concentration. In addition, we found that the ROI (iliac in patient 1,2,4 or arch in patient  
201 3) showed the highest correlations with  $E_{\max}$  and  $E_{\min}$ , which indicated that the thrombus formation in  
202 these regions was mostly sensitive to the alteration in heart function.

203 Collectively, these data indicated that the increase in  $E_{\max}$  and decrease in  $E_{\min}$  would both  
204 inhibit thrombus formation, and the effect of T was not significant.

## 205 **Discussion**

206 Endograft mural thrombus accumulation had reported rates up to 33% and was detected as early  
207 as 1 week after EVAR (3). It might be due to cytokine and prothrombotic factors released from the  
208 intramural thrombus of the aneurysm triggered by the operation. Whether the risk of long-term  
209 thrombotic events could be increased is debatable (21). Mestres et al. reported that endograft mural  
210 thrombotic deposits were related to device occlusion during 24 months of follow-up (22), while  
211 Melson et al. did not find a significant association (23). Previous studies on CFD-based thrombus  
212 simulation mainly focused on the intra-luminal thrombosis in the sac of AAA. Abnormal wall shear  
213 stress, platelet activation, vortical structures, and morphological parameters were all found to play a  
214 potential role (24-27). Regarding intra-prothetic thrombosis, Nauta and colleagues investigated the  
215 alteration of PLAP in one patient receiving 3 virtual interventions including TEVAR (28). Liu et al.  
216 explored the TAWSS, OSI, and RRT levels in 3 patients who underwent multibranched endovascular  
217 repair (29). Most of these studies referred to previous works or idealized values for boundary blood  
218 flow and pressure profiles.

219 Thrombosis involves complex interlinked interactions between platelets, coagulation cascades,  
220 and the vascular wall (30). In this study, traditional hemodynamics parameters including WSS, OSI,  
221 and RRT did not precisely identified regions of thrombus formation, probably due to the lack of  
222 reflection of this complex reactions. In a former study, we used a numeric thrombus prediction model  
223 to calculate the vascular remodeling and thrombotic events in one patient receiving hybrid repair for  
224 the middle aortic syndrome, which was consistent with follow-up images (8). The continuum-  
225 macroscopic scale model could capture the clotting patterns taking both activated platelets, local  
226 hemodynamic conditions, and residence time into account (7). Herein, this numeric model was  
227 applied to 4 patients receiving EVAR. In line with CTA results, thrombus formation was observed at



228 iliac branches in 3 patients and at the opening of LSCA in 1 patient. Iliac endografts are commonly  
229 reported places for thrombosis, and the aorto-uni-iliac configuration was confirmed as a risk factor  
230 for intra-prosthetic thrombus (IPT) deposit in a meta-analysis (4). The low-density mural thrombus in  
231 the descending aorta, on the other hand, may originate from the disruption of vulnerable  
232 atherosclerotic plaques (31). Our result suggested that this numeric model was suitable for both intra-  
233 luminal and intra-prosthetic thrombosis prediction.

234 Previous works investigating the relationship between cardiac function and EVAR complications  
235 were mainly retrospective cohorts or reviews (12, 32). To the best of our knowledge, this is the first  
236 attempt at using a cardiac numeric model for post-EVAR patients. Lumped heart models used simple  
237 parameters such as resistance and capacitance to simulate the relaxation, filling, contraction, and  
238 ejection phases of the heart, and have been widely studied for their interaction with the arterial vessel  
239 systems (33). In this study, we used a 0-D cardiac model adapted from Kim et al. to simulate the  
240 change in heart function especially ventricular pressure/volume depending on the time-varying  
241 elastance curve (34).  $E_{max}$  represented the maximum ventricular contractility,  $E_{min}$  represented  
242 ventricular compliance or end-diastolic pressure, and  $t$  stood for the cardiac cycle. Heart failure with  
243 reduced ejection fraction (HFrEF) or with preserved ejection fraction (HFpEF) could be mimicked  
244 under the circumstances. The influence of cardiac parameters on thrombosis was reflected by altered  
245 BP levels.

246 Concerning the actual thrombus forming area, both elevated or reduced  $E_{min}$  and  $t$  promoted  
247 thrombus formation, yet changes of  $E_{max}$  induced distinct results. It should be noted that BP levels  
248 in patients 1 and 3 were higher and more concentrated around the actual thrombus-forming area.  
249 Despite thrombus deposition in the local iliac stent, the BP in patients 2 and 4 had relatively low  
250 absolute value and occupied a more extensive spatial range. Morphological factors such as increasing  
251 diameter because of stent oversize may have a stronger influence on thrombosis in these patients, and  
252 the impact of cardiac parameter alteration should be cautiously interpreted. The heterogeneous results  
253 from different patients emphasized the importance of individualized analysis.

254 Quantitation calculation of BP for general aortic parts revealed that  $E_{max}$  was negatively  
255 associated with thrombus formation while  $E_{min}$  was positively related. It has been reported that male  
256 AAA patients had reduced ventricular systolic and diastolic function (35). Our result indicated that  
257 for patients with CHD (both HFrEF and HFpEF) in clinical practice, we should pay more attention to  
258 their increased risk of thrombus formation after EVAR. Additionally, preservation of maximum

259 ventricular contractile force and stabilization of ventricular compliance or heart rate was also a  
260 crucial consideration when selecting supporting drugs.

261 This study has some limitations. Patient-specific outflow data of each aortic branch may not  
262 always be available, especially for supra-arch branches in AAA patients, and assumptions were made  
263 for blood distribution in a limited number of branches according to the literature. The simulation  
264 process should be applied in a larger patient cohort to validate our findings. Besides, we ignored the  
265 arterial deformation in the 3D calculation. Future studies may combine fluid-structure interaction  
266 (FSI) models with mass transport models of thrombus to more realistically predict thrombus  
267 formation in deformed vessels(36, 37).

## 268 **Conclusion**

269 In conclusion, patients with CHD after EVAR may have an increased risk of thrombosis.  
270 Postoperative cardiac support recommends drugs that support maximum ventricular contractile force,  
271 maintain left ventricular pressure, and stabilize heart rate.

272

## 273 **Conflict of Interest**

274 The authors declare that the research was conducted in the absence of any commercial or financial  
275 relationships that could be construed as a potential conflict of interest.

276

## 277 **Author Contributions**

278 X.S, S.T., Y.H., Y.L., and T.M. led the modelling and calculation of thrombus formation. X.S., T.M.  
279 Y.Z., X.L. conceived, designed, and led the interpretation of the project. X.S, S.T., R.Z., Z.L.  
280 provides and analyses the clinical data. Y.C. constructed the lumped-elements model. All authors  
281 contributed to the writing of the manuscript.

## 282 **Funding**

283 This work was supported by the National Natural Science Research Foundation of China (grant no.  
284 11827803, 31971244, 31570947, 32071311, U20A20390, 51890894, 82070492, and 82100519), the  
285 Fundamental Research Funds for the General Universities (KG16186101) and the 111 Project  
286 (B13003). The CAMS Innovation fund for Medical Science (CIFMS, Grant No.2021-I2M-C&T-A-  
287 006 and 2021-I2M-1-016), and the National High Level Hospital Clinical Research Funding (Grant  
288 No.2022-PUMCH-B-100 and 2022-PUMCH-A-190). The funders had no role in study design, data  
289 collection, analysis, decision to publish, or preparation of the manuscript.

290

291 **Acknowledgments**

292 None.

293

294

295 **References**

- 296 1. Lim S, Halandras PM, Park T, Lee Y, Crisostomo P, Hershberger R, et al. Outcomes of  
297 endovascular abdominal aortic aneurysm repair in high-risk patients. *Journal of vascular surgery*.  
298 2015;61(4):862-8.
- 299 2. Isselbacher EM, Preventza O, Black JH, 3rd, Augoustides JG, Beck AW, Bolen MA, et al.  
300 2022 ACC/AHA Guideline for the Diagnosis and Management of Aortic Disease: A Report of the  
301 American Heart Association/American College of Cardiology Joint Committee on Clinical Practice  
302 Guidelines. *Circulation*. 2022.
- 303 3. Maleux G, Koolen M, Heye S, Heremans B, Nevelsteen A. Mural thrombotic deposits in  
304 abdominal aortic endografts are common and do not require additional treatment at short-term and  
305 midterm follow-up. *Journal of vascular and interventional radiology : JVIR*. 2008;19(11):1558-62.
- 306 4. Perini P, Bianchini Massoni C, Azzarone M, Ucci A, Rossi G, Gallitto E, et al. Significance  
307 and Risk Factors for Intraprosthetic Mural Thrombus in Abdominal Aortic Endografts: A Systematic  
308 Review and Meta-analysis. *Annals of vascular surgery*. 2018;53:234-42.
- 309 5. Banno H, Kawai Y, Sato T, Tsuruoka T, Sugimoto M, Kodama A, et al. Low-density  
310 vulnerable thrombus/plaque volume on preoperative computed tomography predicts for spinal cord  
311 ischemia after endovascular repair for thoracic aortic aneurysm. *Journal of vascular surgery*.  
312 2021;73(5):1557-65.e1.
- 313 6. Cunningham KS, Gotlieb AI. The role of shear stress in the pathogenesis of atherosclerosis.  
314 *Laboratory investigation; a journal of technical methods and pathology*. 2005;85(1):9-23.
- 315 7. Menichini C, Xu XY. Mathematical modeling of thrombus formation in idealized models of  
316 aortic dissection: initial findings and potential applications. *Journal of mathematical biology*.  
317 2016;73(5):1205-26.
- 318 8. Sun X, Ma T, Liu Z, Wu X, Zhang B, Zhu S, et al. Sequential numerical simulation of  
319 vascular remodeling and thrombosis in unconventional hybrid repair of ruptured middle aortic  
320 syndrome. *Medical engineering & physics*. 2021;94:87-95.
- 321 9. Pirola S, Cheng Z, Jarral OA, O'Regan DP, Pepper JR, Athanasiou T, et al. On the choice of  
322 outlet boundary conditions for patient-specific analysis of aortic flow using computational fluid  
323 dynamics. *Journal of biomechanics*. 2017;60:15-21.
- 324 10. Alastruey J, Xiao N, Fok H, Schaeffter T, Figueroa CA. On the impact of modelling  
325 assumptions in multi-scale, subject-specific models of aortic haemodynamics. *Journal of the Royal  
326 Society, Interface*. 2016;13(119).
- 327 11. Kim W, Gandhi RT, Peña CS, Herrera RE, Scherthaner MB, Tsoukas A, et al. Effect of  $\beta$ -  
328 blocker on aneurysm sac behavior after endovascular abdominal aortic repair. *Journal of vascular  
329 surgery*. 2017;65(2):337-45.
- 330 12. Salata K, Syed M, Hussain MA, Eikelboom R, de Mestral C, Verma S, et al. Renin-  
331 angiotensin system blockade does not attenuate abdominal aortic aneurysm growth, rupture rate, or  
332 perioperative mortality after elective repair. *Journal of vascular surgery*. 2018;67(2):629-36.e2.
- 333 13. Saratzis A, Saratzis N, Melas N, Kiskinis D. Pharmacotherapy before and after endovascular  
334 repair of abdominal aortic aneurysms. *Current vascular pharmacology*. 2008;6(4):240-9.

- 335 14. Arthurs CJ, Khlebnikov R, Melville A, Marčan M, Gomez A, Dillon-Murphy D, et al.  
336 CRIMSON: An open-source software framework for cardiovascular integrated modelling and  
337 simulation. *PLoS computational biology*. 2021;17(5):e1008881.
- 338 15. Westerhof N, Lankhaar J-W, Westerhof BE. The arterial windkessel. *Medical & biological*  
339 *engineering & computing*. 2009;47(2):131-41.
- 340 16. Suga H, Sagawa K. Instantaneous pressure-volume relationships and their ratio in the excised,  
341 supported canine left ventricle. *Circulation research*. 1974;35(1):117-26.
- 342 17. Goldberger AL, Amaral LA, Glass L, Hausdorff JM, Ivanov PC, Mark RG, et al. PhysioBank,  
343 PhysioToolkit, and PhysioNet: components of a new research resource for complex physiologic  
344 signals. *circulation*. 2000;101(23):e215-e20.
- 345 18. Stergiopoulos N, Meister J-J, Westerhof N. Determinants of stroke volume and systolic and  
346 diastolic aortic pressure. *American Journal of Physiology-Heart and Circulatory Physiology*.  
347 1996;270(6):H2050-H9.
- 348 19. Menichini C, Cheng Z, Gibbs RG, Xu XY. Predicting false lumen thrombosis in patient-  
349 specific models of aortic dissection. *Journal of The Royal Society Interface*. 2016;13(124):20160759.
- 350 20. Menichini C, Xu XY. Mathematical modeling of thrombus formation in idealized models of  
351 aortic dissection: initial findings and potential applications. *Journal of mathematical biology*.  
352 2016;73(5):1205-26.
- 353 21. Kapetanios DM, Karkos CD, Papazoglou KO. Changes in circulating markers of coagulation  
354 and fibrinolysis after EVAR. *International angiology : a journal of the International Union of*  
355 *Angiology*. 2018;37(6):444-50.
- 356 22. Mestres G, Maeso J, Fernandez V, Allegue N, Constenla I, Matas M. Incidence and evolution  
357 of mural thrombus in abdominal aortic endografts. *Annals of vascular surgery*. 2009;23(5):627-33.
- 358 23. Oliveira NF, Bastos Gonçalves FM, Hoeks SE, Ten Raa S, Ultee KH, Rouwet E, et al.  
359 Clinical outcome and morphologic determinants of mural thrombus in abdominal aortic endografts.  
360 *Journal of vascular surgery*. 2015;61(6):1391-8.
- 361 24. Hansen KB, Arzani A, Shadden SC. Mechanical platelet activation potential in abdominal  
362 aortic aneurysms. *Journal of biomechanical engineering*. 2015;137(4):041005.
- 363 25. Zambrano BA, Gharahi H, Lim C, Jaber FA, Choi J, Lee W, et al. Association of  
364 Intraluminal Thrombus, Hemodynamic Forces, and Abdominal Aortic Aneurysm Expansion Using  
365 Longitudinal CT Images. *Annals of biomedical engineering*. 2016;44(5):1502-14.
- 366 26. Bhagavan D, Di Achille P, Humphrey JD. Strongly Coupled Morphological Features of  
367 Aortic Aneurysms Drive Intraluminal Thrombus. *Scientific reports*. 2018;8(1):13273.
- 368 27. Zambrano BA, Gharahi H, Lim CY, Lee W, Baek S. Association of vortical structures and  
369 hemodynamic parameters for regional thrombus accumulation in abdominal aortic aneurysms.  
370 *International journal for numerical methods in biomedical engineering*. 2022;38(2):e3555.
- 371 28. Nauta FJH, Lau KD, Arthurs CJ, Eagle KA, Williams DM, Trimarchi S, et al. Computational  
372 Fluid Dynamics and Aortic Thrombus Formation Following Thoracic Endovascular Aortic Repair.  
373 *The Annals of thoracic surgery*. 2017;103(6):1914-21.
- 374 29. Liu MY, Jiao Y, Liu J, Zhang S, Li W. Hemodynamic Parameters Predict In-stent  
375 Thrombosis After Multibranched Endovascular Repair of Complex Abdominal Aortic Aneurysms: A

- 376 Retrospective Study of Branched Stent-Graft Thrombosis. *Frontiers in cardiovascular medicine*.  
377 2021;8:654412.
- 378 30. Chong MY, Gu B, Armour CH, Dokos S, Ong ZC, Xu XY, et al. An integrated fluid-structure  
379 interaction and thrombosis model for type B aortic dissection. *Biomechanics and modeling in*  
380 *mechanobiology*. 2022;21(1):261-75.
- 381 31. Virmani R, Burke AP, Farb A, Kolodgie FD. Pathology of the vulnerable plaque. *Journal of*  
382 *the American College of Cardiology*. 2006;47(8 Suppl):C13-8.
- 383 32. Kurzencwyg D, Filion KB, Pilote L, Nault P, Platt RW, Rahme E, et al. Cardiac medical  
384 therapy among patients undergoing abdominal aortic aneurysm repair. *Annals of vascular surgery*.  
385 2006;20(5):569-76.
- 386 33. Hunter PJ, Pullan AJ, Smaill BH. Modeling total heart function. *Annual review of biomedical*  
387 *engineering*. 2003;5:147-77.
- 388 34. Kim HJ, Vignon-Clementel IE, Figueroa CA, LaDisa JF, Jansen KE, Feinstein JA, et al. On  
389 coupling a lumped parameter heart model and a three-dimensional finite element aorta model. *Annals*  
390 *of biomedical engineering*. 2009;37(11):2153-69.
- 391 35. Åström Malm I, De Basso R, Engvall J, Blomstrand P. Males with abdominal aortic  
392 aneurysm have reduced left ventricular systolic and diastolic function. *Clinical physiology and*  
393 *functional imaging*. 2022;42(1):1-7.
- 394 36. Ma T, Liu X, Ren Q, Zhang Z, Sun X, Zheng Y, et al. Flow-mediated dilation analysis  
395 coupled with nitric oxide transport to enhance the assessment of endothelial function. *Journal of*  
396 *Applied Physiology*. 2021;131(1):1-14.
- 397 37. Chong MY, Gu B, Armour CH, Dokos S, Ong ZC, Xu XY, et al. An integrated fluid-  
398 structure interaction and thrombosis model for type B aortic dissection. *Biomechanics and Modeling*  
399 *in Mechanobiology*. 2022;21(1):261-75.

400

401 **Table 1. Clinical information and total BP levels of patients under different heart conditions.**

|                    | Patient 1 | Patient 2 | Patient 3 | Patient 4 | Average      |
|--------------------|-----------|-----------|-----------|-----------|--------------|
| Age, years         | 80        | 70        | 64        | 83        | 74.3 ± 7.6   |
| Sex                | Male      | Female    | Male      | Male      | -            |
| Hypertension       | Yes       | Yes       | Yes       | Yes       | -            |
| Diabetes           | No        | Yes       | No        | No        | -            |
| Smoking            | Yes       | No        | Yes       | No        | -            |
| Laboratory results |           |           |           |           |              |
| LVEF%              | 68        | 74        | 67        | 77        | 71.5 ± 4.2   |
| NT-proBNP, pg/ml   | 104       | 112       | 81        | 77        | 93.5 ± 14.8  |
| D-dimer, mg/L      | 6.31      | 5.3       | 1.67      | 1.41      | 3.7 ± 2.2    |
| HGB, g/L           | 123       | 121       | 150       | 120       | 128.5 ± 12.5 |
| Creatinine, μmol/L | 78        | 70        | 93        | 111       | 88.0 ± 15.6  |
| Follow-up, months  | 35.5      | 47.7      | 34.8      | 11.9      | 32.5 ± 14.9  |

402 BP, bound platelets; E<sub>max</sub>, maximum elastase; E<sub>min</sub>, minimum elastase; LVEF, left ventricular ejection fraction;

403 NT-proBNP, N-terminal pro-brain natriuretic peptide; HGB, hemoglobin.



## Cardiac function and thrombosis after EVAR

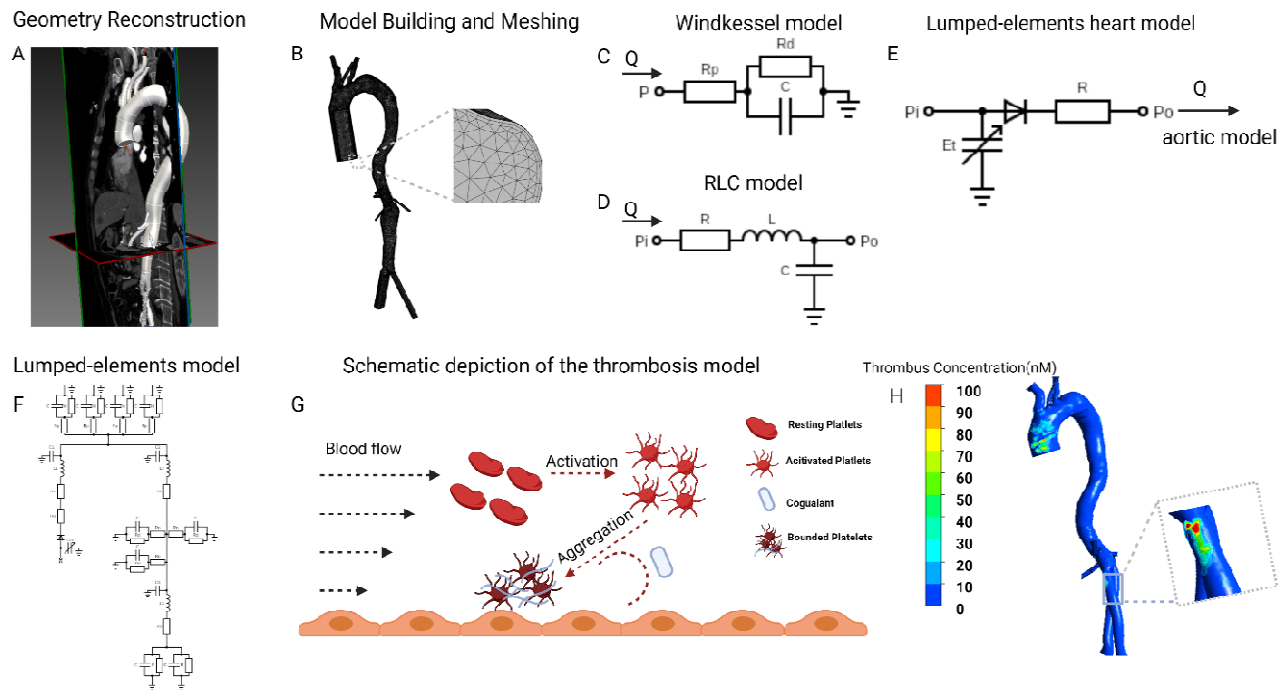

404

### 405 **Figure 1. Flowchart of patient-specific modeling**

406 **A**, Geometry of postoperative aorta was modeled from CTA data, starting from the ascending aorta to  
 407 bilateral common iliac arteries. **B**, Meshing the model and vessel outlets were sufficiently extended  
 408 to allow fully developed flow boundary. **C**, **D**, Building the Windkessel model, lumped-parameter  
 409 aortic model based on the clinical measured blood flow pressure and velocity. **E**, The lumped-  
 410 elements model representing the heart was coupled to the entrance node in the lumped-elements  
 411 aortic model. **F**, Coupling the three kinds of lumped-parameter model to give out the aortic blood  
 412 flow velocity in different heart functions. **G**, The simulation of thrombosis formation involving the  
 413 activation of resting platelets (RPs), the deposition of coagulant (C) and the aggregation of activated  
 414 platelets (APs) to form the bounded platelets (BPs). **H**, Thrombus concentration profile of one patient.  
 415 CTA, computed tomography angiography.

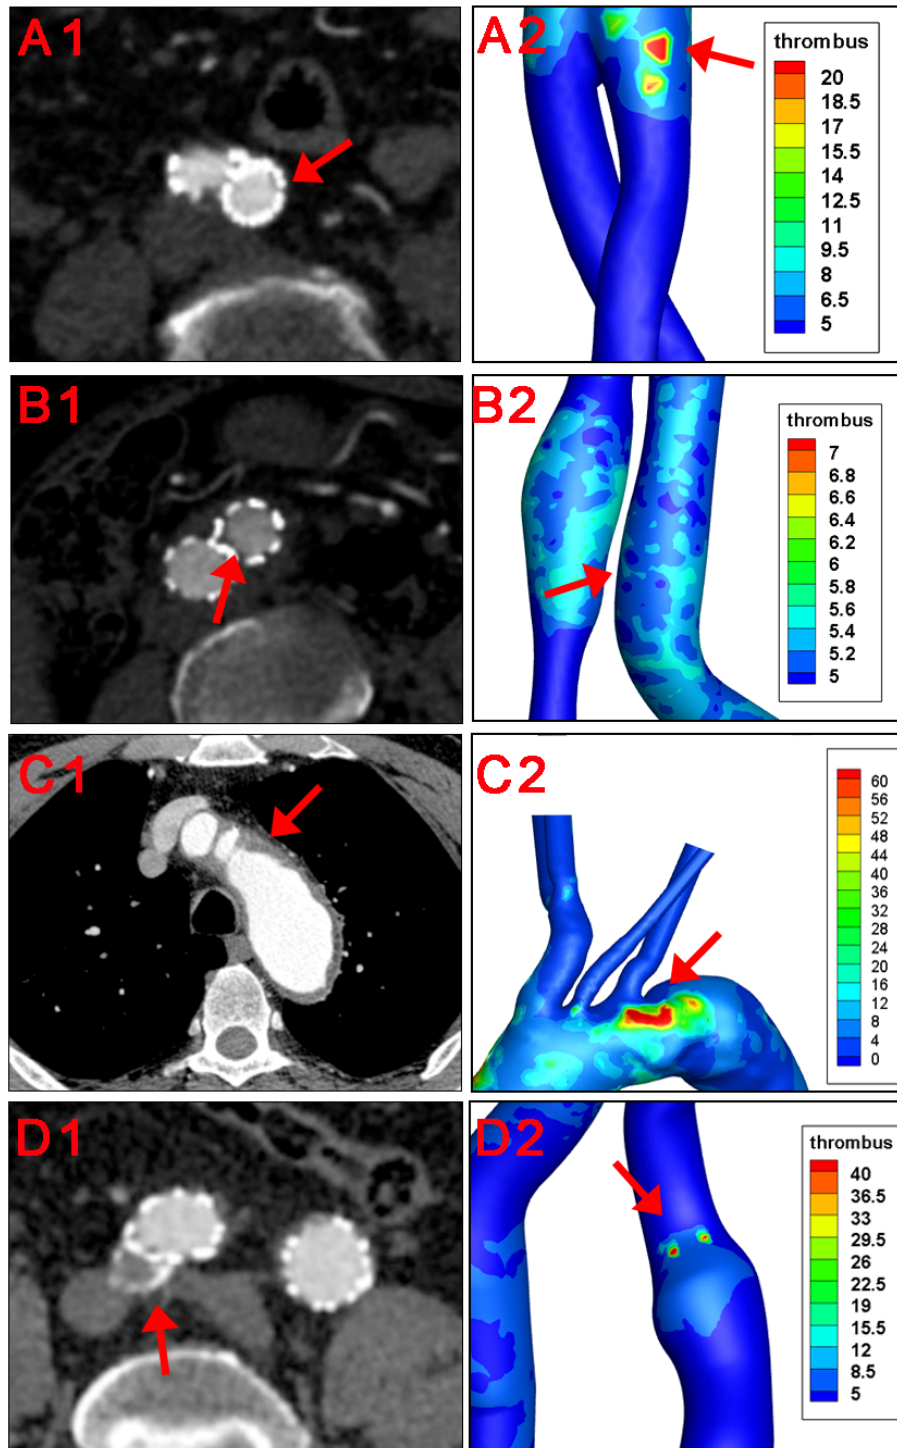

416

417 **Figure 2. Clinical verification of the thrombus forming model.**

418 Red arrows indicated places of thrombus formation on CTA images.

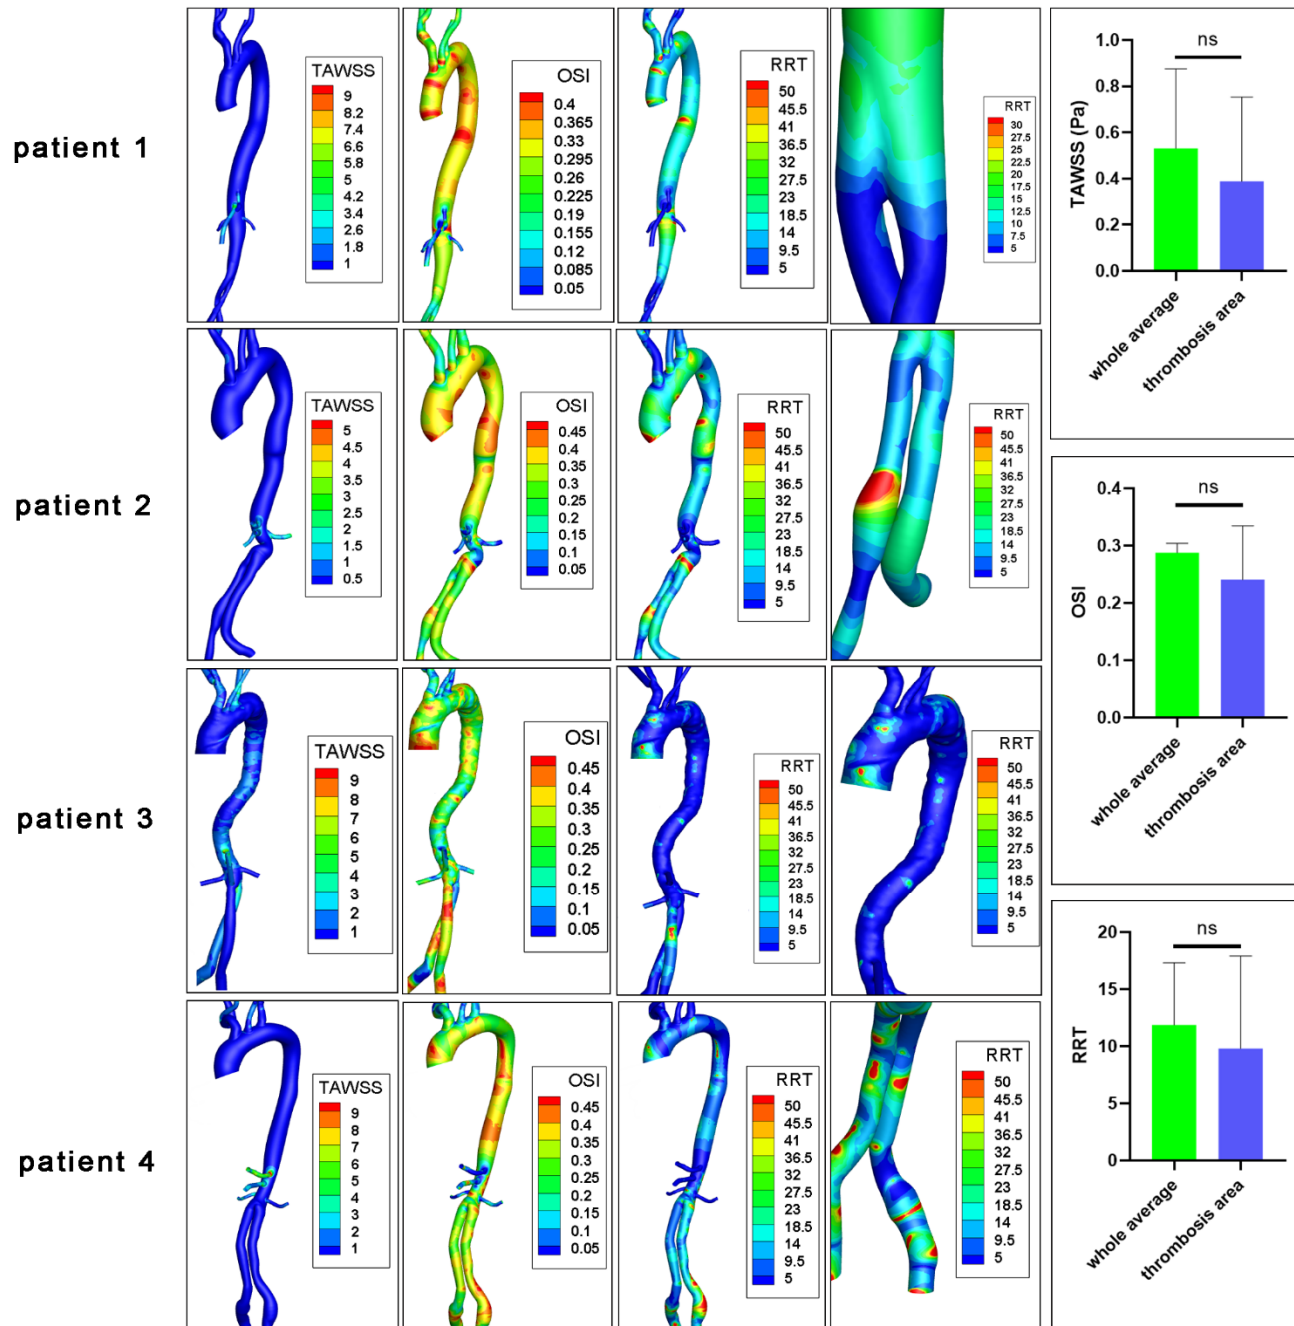

419

420 **Figure 3. CFD characteristics of patients' original models.**

421 TAWSS, time average wall shear stress; OSI, oscillatory shear index; RRT, relative residence time;  
 422 ns, non-significant. The fourth columns indicated RRT levels at ROI.

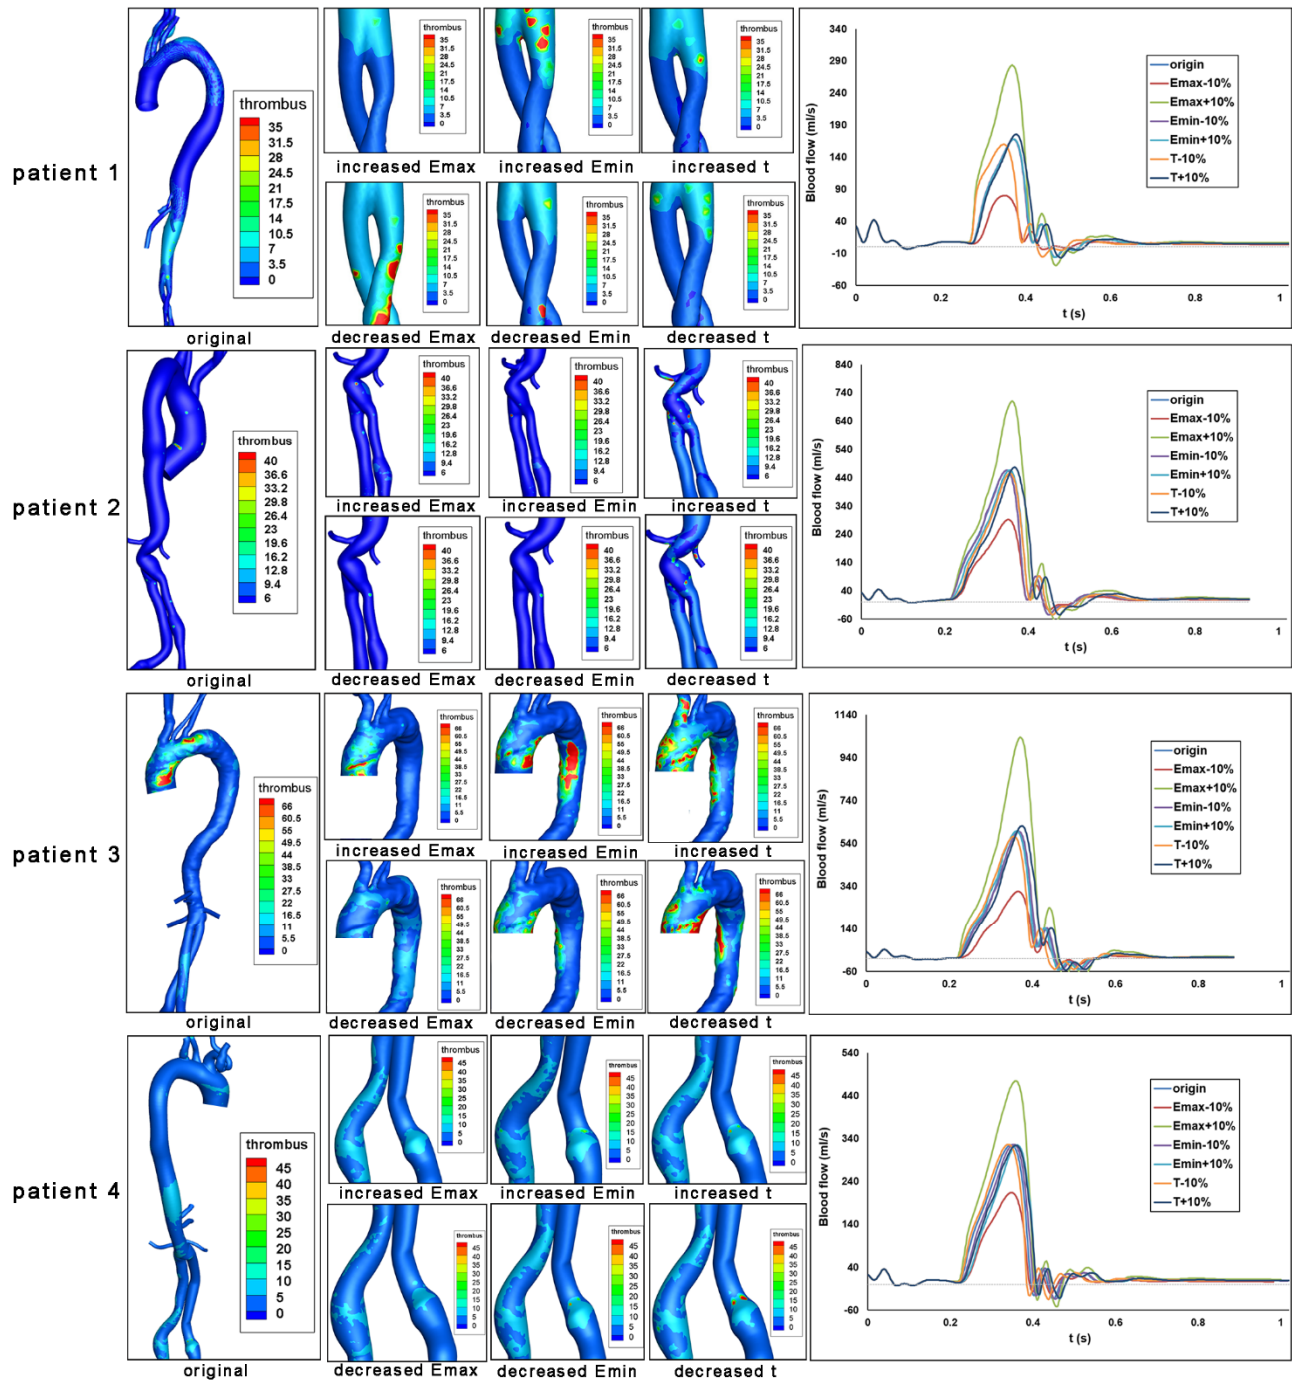

423

424 **Figure 4. Impact of heart function alteration on thrombosis at critical positions.**

425 Bounded platelets (BP) levels under different heart conditions were shown for each patient. Aortic  
 426 blood flow values over a cardiac cycle were also shown.

## Cardiac function and thrombosis after EVAR

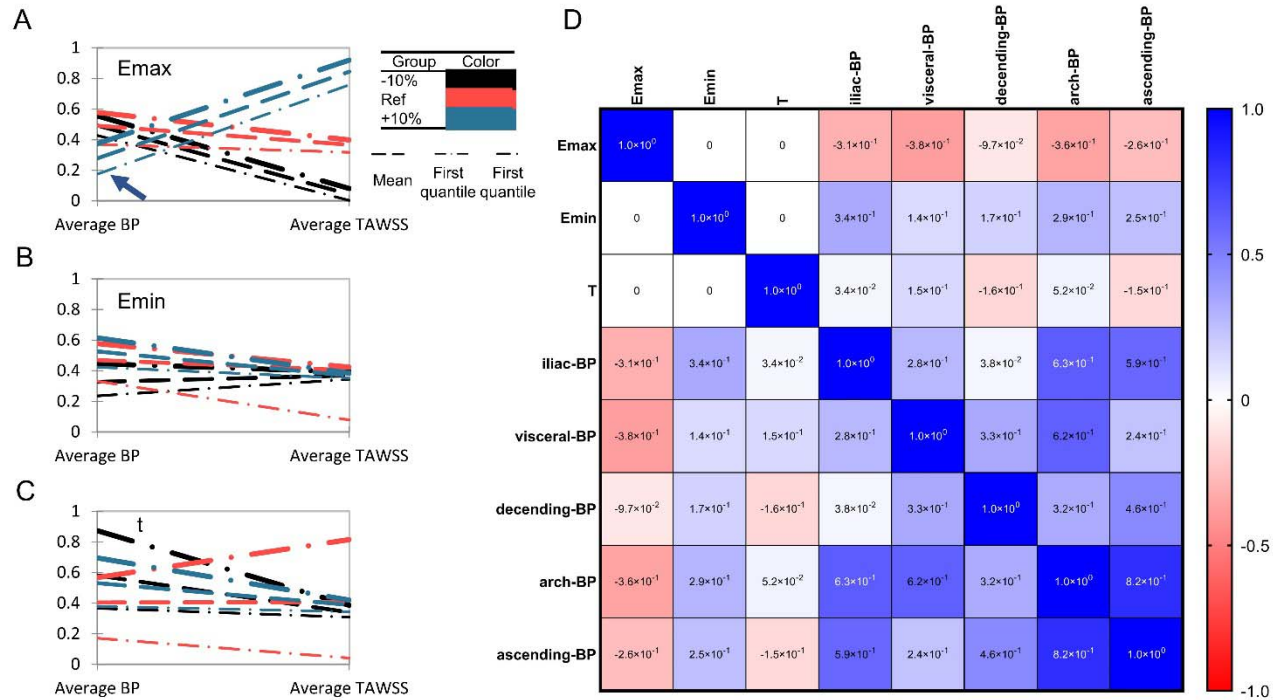

427

428 **Figure 5. Heart function alteration and change of thrombosis or TAWSS at different aortic**  
 429 **parts.**

430 A-C. Parallel coordinate charts of BP concentration and TAWSS classified by heart function ( $E_{max}$ ,  
 431  $E_{min}$ ,  $T$  ranges from +10% to -10% compared with the reference state). BP concentration and TAWSS  
 432 have been rescaled ranges from 0 to 1. The arrowhead in Figure 5A indicates the significant role of  
 433  $E_{max}$  on thrombus formation. D. Multiple correspondence analysis (MCA) of  $E_{max}$ ,  $E_{min}$ ,  $T$ , and BP  
 434 concentration in different aortic sections.
